# Supplementary material for: Quantitative properties and receptor reserve of the DAG and PKC branch of Gq-coupled receptor signaling
Source: PubMed Central journal article supplement — J Gen Physiol. 2013 May;141(5):537–55. doi: 10.1085/jgp.201210887 (PMC3639584; doi:10.1085/jgp.201210887), 2013-05
Supplement: supp_jgp.201210887_JGP_201210887_sm.pdf [file supp_jgp.201210887_JGP_201210887_sm.pdf]

Falkenburger et al., <http://www.jgp.org/cgi/content/full/jgp.201210887/DC1>

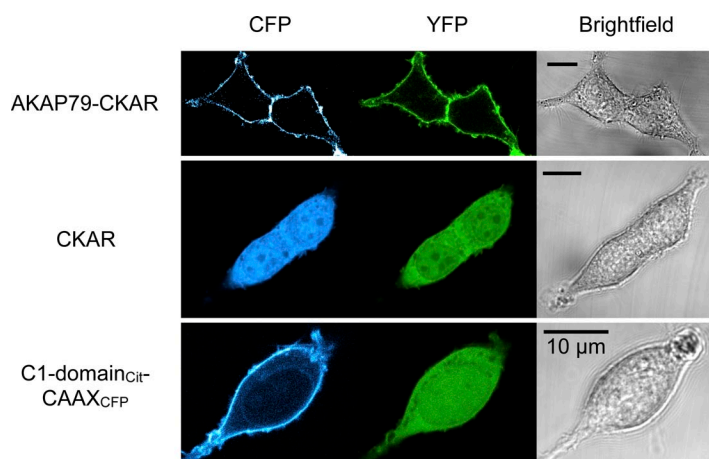

**Figure S1.** Expression patterns of FRET probes. Cells were transfected with the indicated plasmids and imaged by confocal microscopy (63× objective; 710 microscope; Carl Zeiss). The 405- and 516-nm laser lines were used for excitation of CFP and YFP. Emission was collected from 460 to 480 nm and from 540 to 560 nm. Note plasma membrane localization of AKAP-CKAR and CFP-CAAX and the cytosolic localization of CKAR and C1-YFP in resting cells.

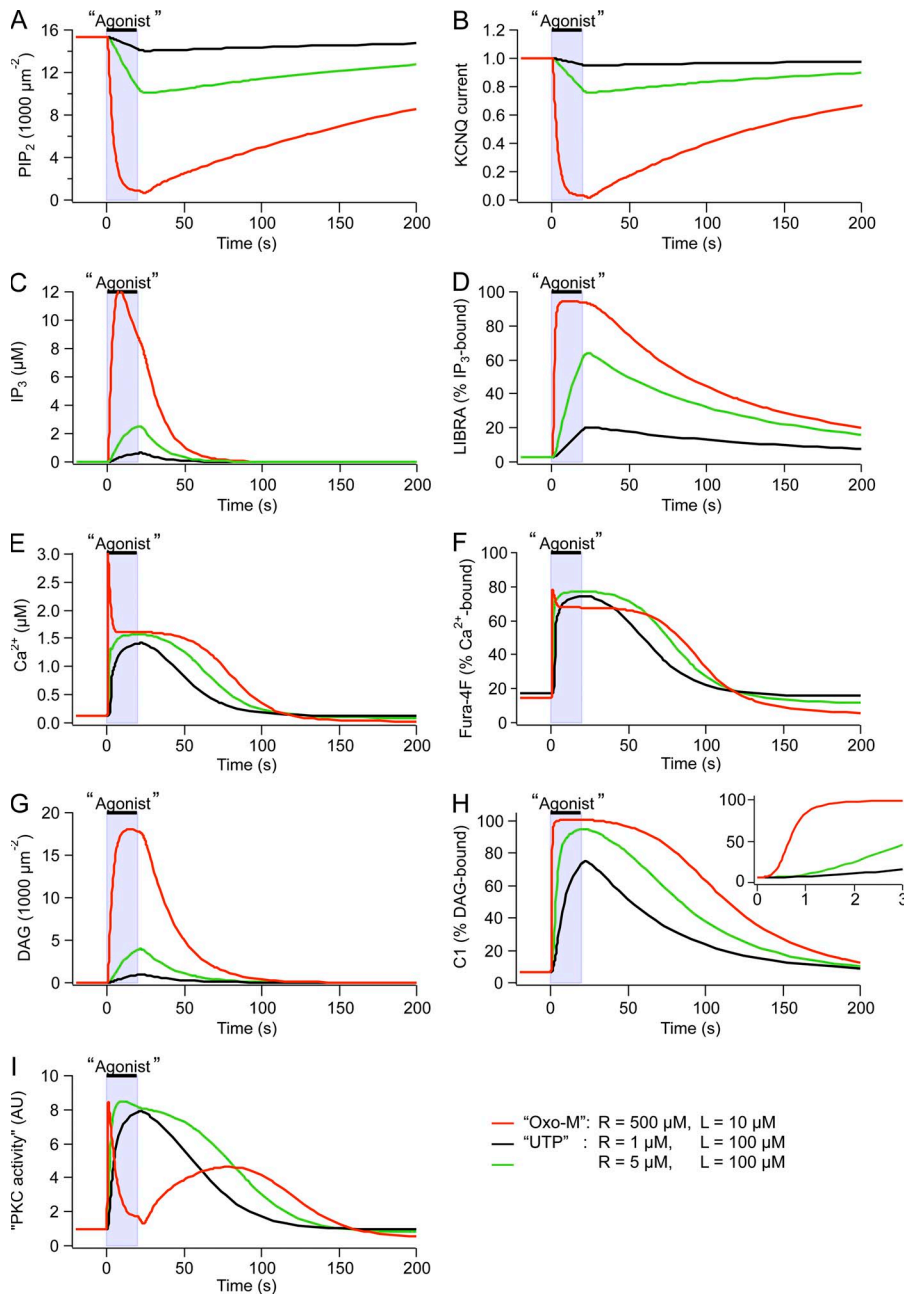

**Figure S2.** Model predictions comparing Oxo-M with UTP by assuming a simple variation of receptor density with no change of receptor properties. (A–I) Lines represent time courses predicted for the indicated species, density of receptors (“R”), and agonist concentrations (“L”). A receptor density of  $500 \mu\text{m}^{-2}$  is our representation of high-density expressed  $M_1$ Rs; a receptor density of  $5 \mu\text{m}^{-2}$  is the density estimated for eP2Y<sub>2</sub>Rs from Western blot analysis (Dickson et al. 2013. *J. Gen. Physiol.* <http://dx.doi.org/10.1085/jgp.201210886>); a density of  $1 \mu\text{m}^{-2}$  best reproduces our experimental findings for eP2Y<sub>2</sub>Rs and corresponds to the density of endogenous receptors expected from typical ratios of receptors to G proteins (Falkenburger et al. 2010. *J. Gen. Physiol.* 135:81–97). The calculation assumes that the “receptor  $K_d$ ” for UTP is the same as that for Oxo-M. In fact,  $K_{UTP}$  may be a little higher than  $K_{Oxo-M}$ . (I) An approximate prediction of PKC activity computed essentially as follows:  $\text{DAG} * \text{PIP}_2 / ((\text{DAG} + K_{DC1}) * (\text{PIP}_2 + K_{DPH}))$ , where  $K_{DC1}$  is the dissociation constant of the complex DAG–C1 domain (from PKC), and  $K_{DPH}$  is the dissociation constant of the complex  $\text{PIP}_2$ –PH domain for  $\text{PIP}_2$  (as a proxy for the unknown affinity of the PKC C2 domain for  $\text{PIP}_2$ ). [LIBRAvIII] was  $6 \mu\text{M}$  for D and 0 for all other panels. [Fura-4F] was  $1 \mu\text{M}$  for F and 0 for all other panels. [C1] was  $0.5 \mu\text{M}$  for H and 0 for all other panels.

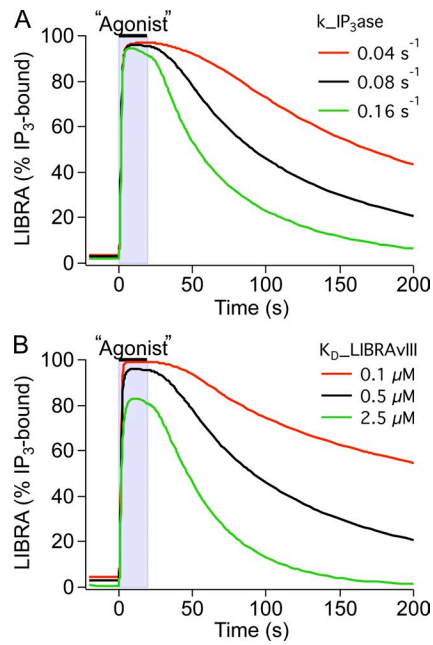

**Figure S3.** Dependence of the LIBRAvIII response on parameters  $k_{IP_3ase}$  and  $K_D_{LIBRAvIII}$ . Computed time courses from the model for the percentage of IP<sub>3</sub>-bound LIBRAvIII, demonstrating the effects of changing the rate constant for IP<sub>3</sub> clearance ( $k_{IP_3ase}$ ; A) or the dissociation constant of LIBRAvIII ( $K_D_{LIBRAvIII}$ ; B). [LIBRAvIII] was 6 μM. The final model parameters used in other figures (see Table 2 in main text) correspond to the middle value (black traces) in each panel of this figure.

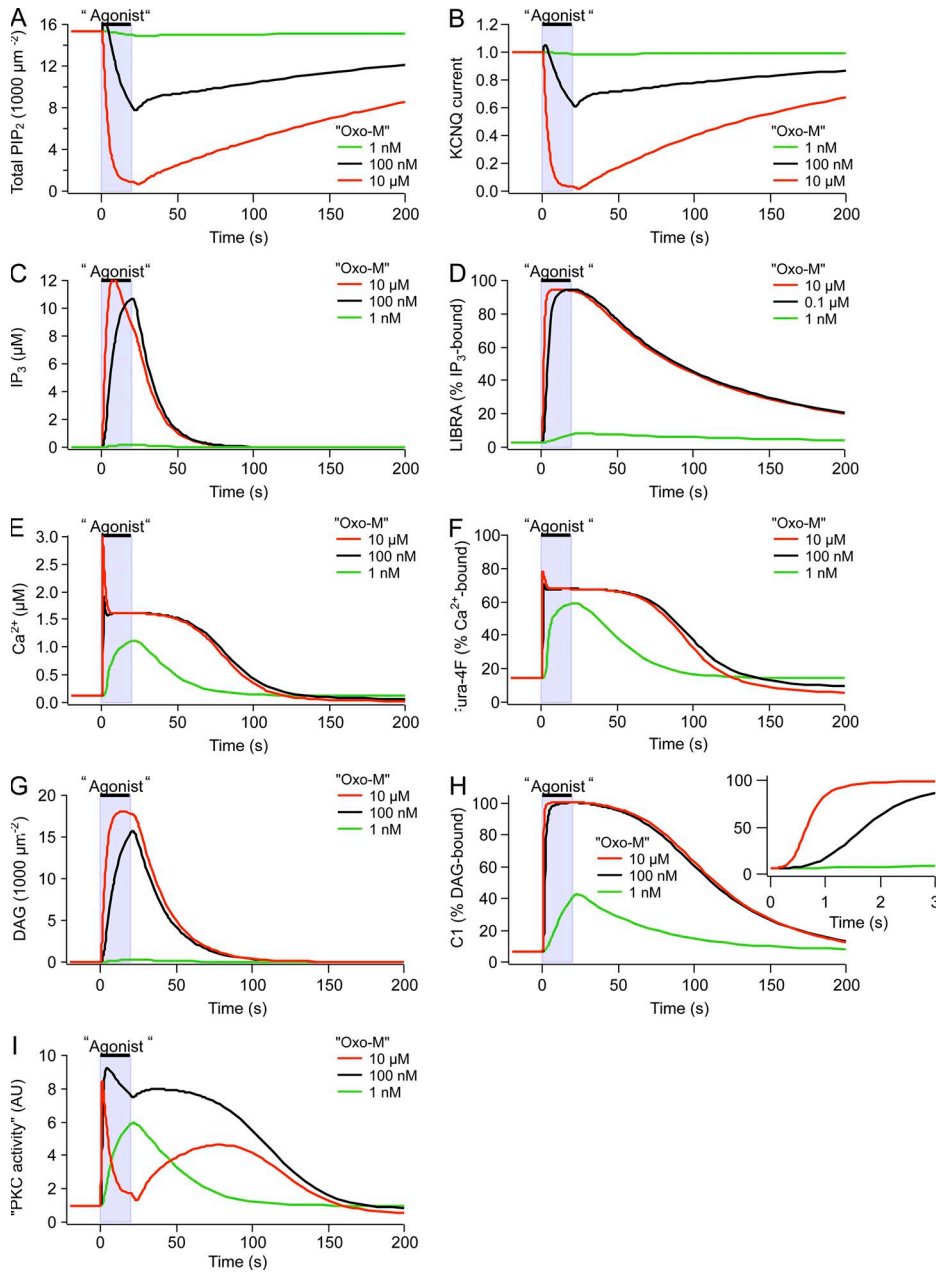

**Figure S4.** Model predictions for a concentration series of Oxo-M. (A–I) Simulated time courses from the model for the indicated species and Oxo-M concentrations. The inset in H shows an enlarged x axis to better appreciate the delayed onset with 100 nM as compared with 10  $\mu$ M Oxo-M. (I) An approximate prediction of PKC activity computed as in Fig. S2 I. [LIBRAvIII] was 6  $\mu$ M for D and 0 for all other panels. [Fura-4F] was 1  $\mu$ M for F and 0 for all other panels. [C1] was 0.5  $\mu$ M for H and 0 for all other panels.

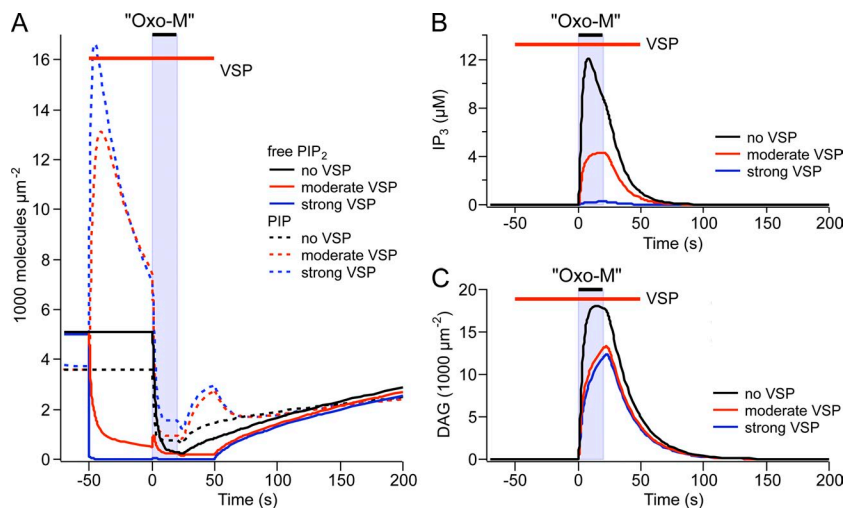

**Figure S5.** Computational study of VSP activation during Oxo-M. (A) Computed time courses of PI(4)P (PIP) and  $\text{PIP}_2$  in the same simulation as in Fig. 4 (G and H) in the main text. Note the increase in PI(4)P resulting from VSP activation and its relaxation to rest partly through the PI 4-phosphatase. (B) Computed time course of  $\text{IP}_3$  in a simulation as in Fig. 4 (G and H) in the main text, except that  $[\text{LIBRAvIII}]$  was  $0 \mu\text{M}$ . (C) Computed time course of DAG in a simulation as in Fig. 4 (G and H) in the main text, except that  $[\text{C1}]$  was  $0 \mu\text{M}$ . Note that the amount of DAG produced by Oxo-M is a bit smaller, with VSP activation. This results from the clearance of “excess” PI(4)P by the 4-phosphatase as observed in A.

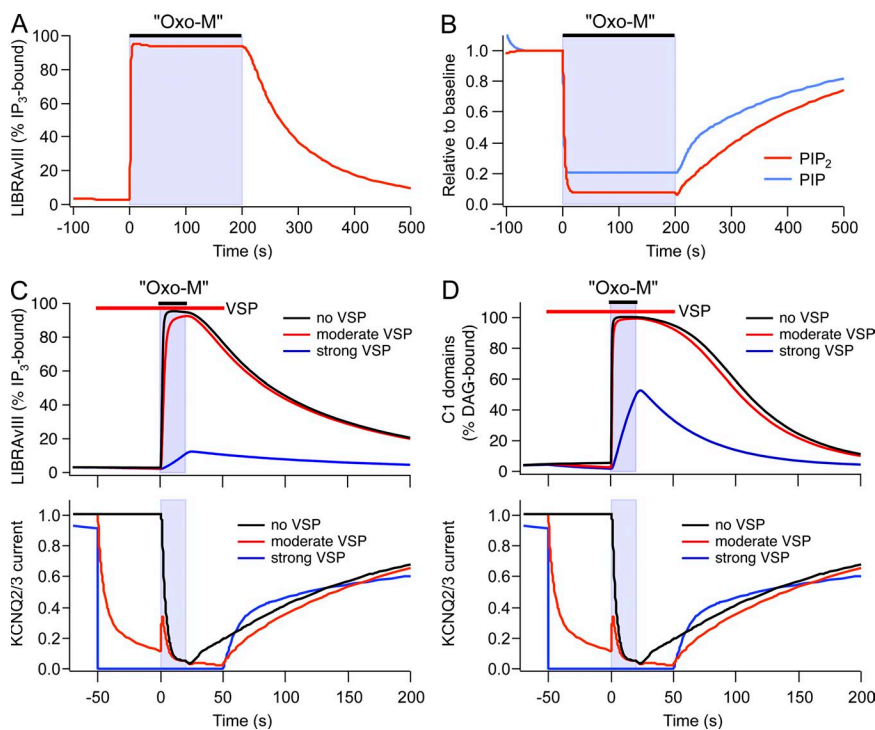

**Figure S6.** Trial model without PIP hydrolysis by PLC. A model was constructed without PIP hydrolysis by PLC. (A) Without  $\text{IP}_2$  generation from PIP, the PI 4-kinase needs to be stimulated less to sustain the LIBRAvIII response during 200 s of Oxo-M. Thus, during agonist,  $k_{4K}$  was accelerated only to  $0.0043 \text{ s}^{-1}$  instead of  $0.006 \text{ s}^{-1}$  in the standard model (see Fig. 7 F in the main text). (B) Without PIP hydrolysis by PLC, the PI 5-kinase needs to be stimulated more to deplete PIP by 80% as observed biochemically (Horowitz et al. 2005. *J. Gen. Physiol.* 126:243–262). Thus,  $k_{5K}$  was accelerated to  $0.82 \text{ s}^{-1}$  instead of  $0.6 \text{ s}^{-1}$  in the standard model. (C and D) Computed time courses of LIBRAvIII saturation, C1 saturation, and KCNQ2/3 current in a simulation as in Fig. 4 (G and H) in the main text, except for the changes noted above. VSP\_max was 0 for “no VSP,”  $0.3 \text{ s}^{-1}$  during “moderate” VSP activation, and  $150 \text{ s}^{-1}$  during “strong” VSP activation. Note that when the LIBRAvIII response is inhibited with “strong VSP,” the C1 response is as well. This contradicts our experimental findings (Fig. 4 in the main text).  $[\text{LIBRAvIII}]$  was  $6 \mu\text{M}$ , and  $[\text{C1}]$  was  $0.5 \mu\text{M}$ .
